# Supplementary material for: Lifetime Risk of Lower‐Extremity Peripheral Artery Disease Defined by Ankle‐Brachial Index in the United States
Source: PubMed Central journal article supplement — J Am Heart Assoc. 2019 Sep 10;8(18):e012177. doi: 10.1161/JAHA.119.012177 (PMC6818002; doi:10.1161/jaha.119.012177), 2019-09-10
Supplement: JAH3-8-e012177-s001.pdf [file JAH3-8-e012177-s001.pdf]

# **SUPPLEMENTAL MATERIAL**

### Data S1. State transition probabilities.

Markov chain model used to simulate the progression of an individual free of peripheral artery disease (PAD) through death or the development of PAD.

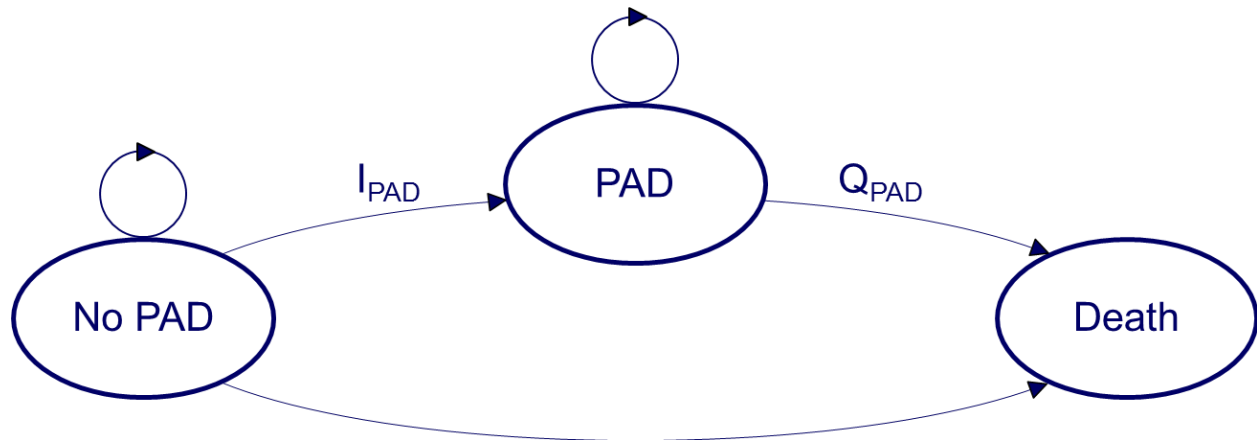

Terms of symbols in the formula

$P_x$  --- prevalence of PAD at a given age, sex and race/ethnicity (from section “Estimating the prevalence of PAD”)

$P_{x+1}$  --- prevalence of PAD at the next year of age as for  $P_{1x}$  (from section “Estimating the prevalence of PAD”)

$HR_x$  --- hazard ratios of mortality for PAD vs. no PAD at a given age, sex and race/ethnicity (from section “Estimating the relative risk of mortality for PAD vs. no PAD”)

$Q_x$  --- annual probability of death for the US population at a given age, sex and race/ethnicity (from National Vital Statistics Report)

$Q_{0x}$  ( $Q_{noPAD}$ ) --- 1-year probability of dying among persons free of PAD at a given age, sex and race/ethnicity

$Q_{1x}$  ( $Q_{PAD}$ ) --- 1-year probability of dying among persons with PAD at a given age, sex and race/ethnicity

$RR_x$  --- risk ratios of mortality for PAD vs. no PAD at a given age, sex and race/ethnicity

$I_x$  ( $I_{PAD}$ ) --- the probability of developing PAD at a given age, sex race/ethnicity

Step 1: calculate  $Q_{0x}$ . This approach is based on the fact that annual overall mortality can be viewed as weighted average of 1-year probability of dying among persons with PAD and that of those without PAD

From Cox survival model

$$Q_{1x} = 1 - (1 - Q_{0x})^{HR_x} \quad (1)$$

$$RR_x = Q_{1x} / Q_{0x} = (1 - (1 - Q_{0x})^{HR_x}) / Q_{0x} \quad (2)$$

$$Q_x = (1 - P_x) Q_{0x} + P_x Q_{1x} = (1 - P_x) Q_{0x} + P_x RR_x Q_{0x} = (1 - P_x + P_x RR_x) Q_{0x} \quad (3)$$

$$Q_{0x} = Q_x / (1 - P_x + P_x RR_x) \quad (4)$$

Since we do not know  $RR_x$ , we used iterations to approximate  $RR_x$ .

From equation (2) above, the limit of  $RR_x$  of  $Q_{0x}$  as  $Q_{0x}$  approaches 0 equals  $HR_x$ . So we used  $HR_x$  as the beginning value of  $RR_x$ . During iterations, we first used equation (4) and  $RR_x$  from the previous iteration to get  $Q_{0x}$  of the current iteration. Then we used equation (2) to get  $RR_x$  of the current iteration. The iterations were stopped until the difference of  $Q_{0x}$  between current and previous iteration was less than  $1E-8$ .

Step 2: calculate  $I_x$ . This approach is based on the fact that the prevalence of no PAD at age of  $x+1$  is determined by four elements, the prevalence of no PAD at age of  $x$ , two types of exits from no PAD, annual incidence of PAD during age of  $x$  or mortality among no PAD during age of  $x$ , and annual mortality of the population.

$$1 - P_{x+1} = (1 - P_x) (1 - I_x - Q_{0x}) / (1 - Q_x) \quad (5)$$

$$1 - I_x - Q_{0x} = (1 - P_{x+1}) (1 - Q_x) / (1 - P_x) \quad (6)$$

$$I_x = 1 - Q_{0x} - (1 - P_{x+1}) (1 - Q_x) / (1 - P_x) \quad (7)$$

The scheme below depicts how we obtained  $I_{PAD,x}$ .

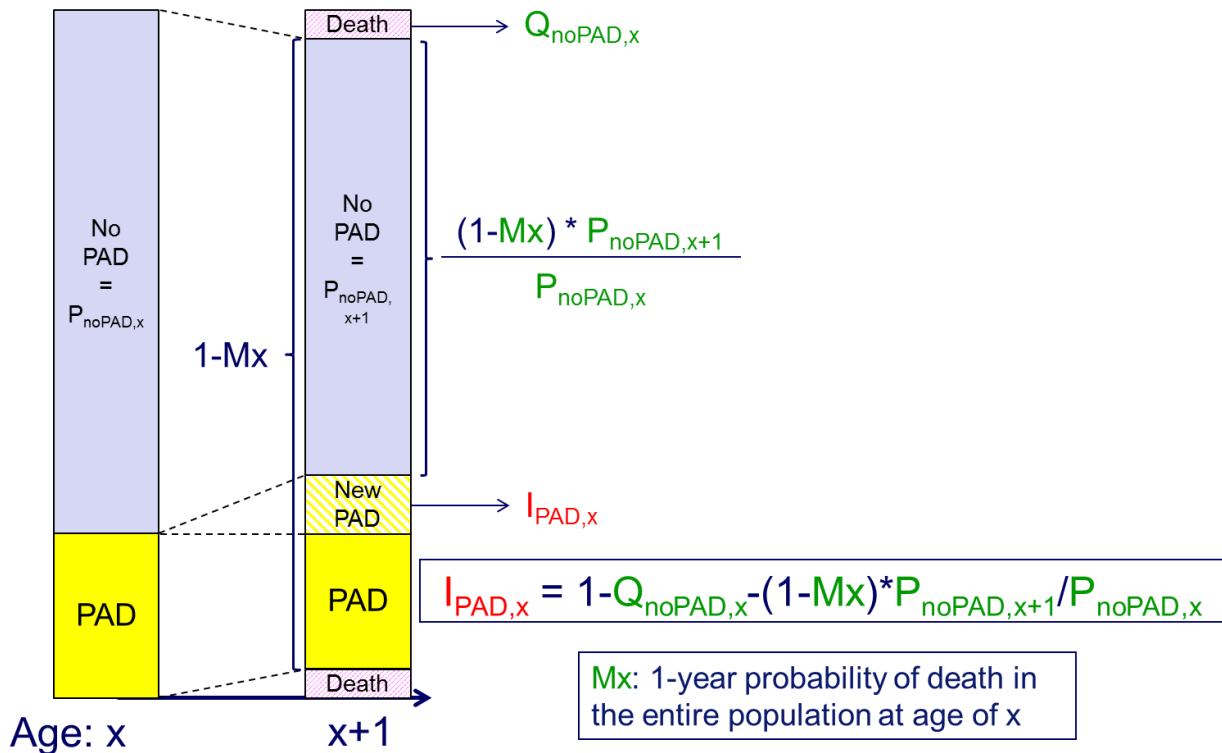

## **Data S2. Methods for measuring ABI in each cohort.**

ARIC: The ABI was measured by Dinamap Model 1846 SX, an oscillometric device.<sup>1</sup> Ankle systolic blood pressure was measured a maximum of four times in a randomly selected single leg, and the last measurement was used for ABI. Brachial systolic blood pressure was measured twice, and the first measurement was used.

FHS and FOF: The ABI was measured using an 8-MHz Doppler probe and an ultrasonic Doppler flow detector (Parks Medical Electronics Inc, Shaw Aloha, Oregon).<sup>2,3</sup> Systolic blood pressure was measured twice on both arms and both ankles. When the first two blood pressure values were different by >10 mmHg at any site, a third measurement was performed. When the posterior tibial pulse was not located, measurement was conducted at the dorsalis pedis artery. The ABI was calculated for each leg as the average ankle systolic blood pressure divided by the average systolic blood pressure of the higher arm.

MESA: The ABI was measured by a handheld Doppler instrument with a 5-MHz probe.<sup>4</sup> Systolic blood pressure was measured at the right and left brachial, dorsalis pedis, and posterior tibial arteries. The higher value of brachial artery pressure was used as the denominator of ABI. The higher pressure from dorsalis pedis or posterior tibial was used as the numerator of ABI for each leg, and the smaller value between right or left was recorded.

NHANES: Systolic blood pressure was measured on the right arm (left arm was used if there were any conditions on the right arm that would interfere with blood pressure measurement) and bilateral posterior tibial arteries.<sup>5</sup> The measurements were done twice among participants aged 40-59 years and once in participants aged 60 years or older. ABI was calculated for each leg by dividing the average systolic blood pressure in the ankle by the average blood pressure in the arm, and the smaller value was recorded.

### **Data S3. Residual lifetime cumulative incidence by traditional atherosclerotic risk factors.**

Lifetime cumulative incidence estimates at a given age, sex and race/ethnicity can be viewed as a weighted average of residual lifetime risk of subgroups determined by combinations of the presence and absence (or higher and lower values if continuous factors) of traditional risk factors at that given age, sex and race/ethnicity. Using sample weights and actual values of traditional risk factors in NHANES, we first estimated lifetime cumulative incidence for a hypothetical person at a given age, sex and race/ethnicity, as well as traditional risk factors.

Terms of symbols in the formula

$R_x$  --- Lifetime cumulative incidence estimates of PAD at a given age, sex and race/ethnicity (from section "Lifetime accumulative incidence estimation")

$R_{x0}$  --- Lifetime cumulative incidence estimates of PAD at a given age, sex and race/ethnicity for a hypothetical person with given values of traditional risk factors (no diabetes, nonsmoker, systolic blood pressure 120 , high-density lipoprotein cholesterol 60mg/dL, total cholesterol 200 mg/dL and no history of CHD or stroke)

$R_{xi}$  --- Lifetime cumulative incidence estimates of PAD at a given age, sex and race/ethnicity for a real individual in NHANES with actual values of traditional risk factors

$OR_{xi}$  --- odds ratios of PAD for a real individual in NHANES compared to the hypothetical person at the same sex and race/ethnicity group and within 5 year of age (from section "Estimating relative risk of PAD for traditional risk factors", combined with difference between actual value of the individual and the given value of the hypothetical person for each risk factor as well as age)

$W_{xi}$  --- sample weight for a real individual in NHANES at the same sex and race/ethnicity group and within 5 year of age

$TW$  --- total sample weight for real individuals in NHANES at the same sex and race/ethnicity group and within 5 year of age

$RR_{xi}$  --- risk ratios of PAD for a real individual in NHANES compared to the hypothetical person at the same sex and race/ethnicity group and within 5 year of age.

From logistic model

$$R_{xi} = R_{x0} OR_{xi} / (1 - R_{x0} + R_{x0} OR_{xi}) \quad (8)$$

$$RR_{xi} = R_{xi} / R_{x0} = OR_{xi} / (1 - R_{x0} + R_{x0} OR_{xi}) \quad (9)$$

$$R_x = \text{sum of } i (R_{xi} W_{xi} / TW) = \text{sum of } i (RR_{xi} R_{x0} W_{xi} / TW) = \text{sum of } i (RR_{xi} W_{xi}) R_{x0} / TW \quad (10)$$

$$R_{x0} = R_x TW / \text{sum of } i (RR_{xi} W_{xi}) \quad (11)$$

Since we do not know  $RR_{xi}$ , we used iterations to approximate  $RR_{xi}$ .

From equation (9) above,  $RR_{xi}$  approximately equals  $OR_{xi}$  when  $R_{x0}$  is very small. So we used  $OR_{xi}$  as the beginning value of  $RR_{xi}$ . During iterations, we first used equation (11) and  $RR_{xi}$  from the previous iteration to get  $R_{x0}$  of the current iteration. Then we used equation (9) to get  $RR_{xi}$  of the current iteration. The iterations were stopped until the difference of  $R_{x0}$  between current and previous iteration was less than  $1E-8$ .

By using equation (9) above, we can estimate residual lifetime cumulative incidence for scenarios with combinations of any traditional risk factors.

**Data S4. Project an Individual's residual cumulative incidence (%) of PAD in the United States.**

**Step 1: Calculate linear function (B) for individual participant**

$$B = 0.1194242 \times (\text{SBP} - 120) / 10 - 0.3924322 \times (\text{HDL} - 1.5516) + 0.1301318 \times (\text{Tchol} - 5.172) + 0.4291214 \text{ (if diabetes)} + 0.4024582 \text{ (if former smoker)} + 1.129064 \text{ (if current smoker)} + 0.6998957 \text{ (if history of CVD)}$$

**Step 2: Use the Lifetime Risk (%) for given age, sex, and race x (Hx)**

| Age Group | White Man | White Woman | Black Man | Black Woman | Hispanic Man | Hispanic Woman |
|-----------|-----------|-------------|-----------|-------------|--------------|----------------|
| 40-44     | 10.996    | 13.045      | 16.922    | 16.335      | 10.601       | 14.178         |
| 45-49     | 9.307     | 11.033      | 16.605    | 14.678      | 9.197        | 13.352         |
| 50-54     | 8.760     | 9.401       | 14.730    | 16.944      | 11.227       | 13.878         |
| 55-59     | 8.473     | 9.359       | 18.222    | 15.068      | 8.584        | 12.654         |
| 60-64     | 6.917     | 7.287       | 13.709    | 12.058      | 8.655        | 10.319         |
| 65-69     | 6.481     | 6.698       | 13.971    | 10.647      | 10.156       | 8.857          |
| 70-74     | 5.575     | 5.087       | 11.872    | 6.764       | 7.181        | 6.090          |
| 75-79     | 3.754     | 3.554       | 8.821     | 4.716       | 5.007        | 4.547          |

**Step 3: Project residual cumulative incidence (%) for an individual**

$$\text{Residual cumulative incidence (\%)} = H_x \times \exp(B) / (100 + H_x \times (\exp(B) - 1)) \times 100$$

**Table S1. Baseline study characteristics by sex.**

| Male                                         | Study       |             |             |             |             |               |
|----------------------------------------------|-------------|-------------|-------------|-------------|-------------|---------------|
|                                              | ARIC (6517) | CHS (2428)  | FHS (221)   | FOF (1650)  | MESA (3199) | NHANES (3748) |
| <b>Total of death - N (%)</b>                | 2366 (36%)  | 2123 (87%)  | 173 (78%)   | 239 (14%)   | 653 (20%)   | 895 (24%)     |
| <b>Follow-up time (y) - Mean(SD)</b>         | 18 (5.6)    | 12 (6.5)    | 8.4 (4.0)   | 10 (2.2)    | 12 (2.7)    | 8.8 (2.7)     |
| <b>Age (y) - Mean (SD)</b>                   | 55 (5.9)    | 73 (5.7)    | 79 (3.9)    | 59 (9.7)    | 62 (10)     | 60 (13)       |
| <b>Race/Ethnicity - N (%)</b>                |             |             |             |             |             |               |
| White                                        | 5121 (79%)  | 2092 (86%)  | 221 (100%)  | 1650 (100%) | 1255 (39%)  | 2124 (57%)    |
| Black                                        | 1396 (21%)  | 319 (13%)   | -           | -           | 835 (26%)   | 691 (18%)     |
| Hispanic                                     | -           | 17 (0.70%)  | -           | -           | 1109 (35%)  | 933 (25%)     |
| <b>Smoking Status - N (%)</b>                |             |             |             |             |             |               |
| Never                                        | 1798 (28%)  | 772 (32%)   | 212 (96%)   | 1408 (85%)  | 1296 (41%)  | 1020 (27%)    |
| Former                                       | 2938 (45%)  | 1386 (57%)  | -           | -           | 1438 (45%)  | 2252 (60 %)   |
| Current                                      | 1781 (27%)  | 270 (11%)   | 9 (4.1%)    | 242 (15%)   | 465 (15%)   | 473 (13%)     |
| <b>SBP (mmHg) - Mean (SD)</b>                | 122 (18)    | 136 (21)    | 143 (22)    | 129 (17)    | 126 (19)    | 130 (19)      |
| <b>Total cholesterol (mmol/L) - Mean(SD)</b> | 5.5 (1.0)   | 5.1 (0.9)   | 5.0 (0.8)   | 5.1 (1.0)   | 4.6 (0.9)   | 5.3 (1.1)     |
| <b>HDL cholesterol (mmol/L) - Mean(SD)</b>   | 1.1 (0.4)   | 1.2 (0.3)   | 1.1 (0.4)   | 1.1 (0.3)   | 1.2 (0.3)   | 1.2 (0.4)     |
| <b>Diabetes - N (%)</b>                      | 735 (11%)   | 416 (17%)   | 58 (26%)    | 195 (12%)   | 444 (14%)   | 659 (18%)     |
| <b>History of CHD or stroke - N (%)</b>      | 878 (13%)   | 505 (21%)   | 74 (33%)    | 156 (9.5%)  | 3 (0.09%)   | 576 (15%)     |
| <b>ABI - Mean (SD)</b>                       | 1.16 (0.14) | 1.08 (0.20) | 1.04 (0.23) | 1.14 (0.13) | 1.14 (0.13) | 1.11 (0.16)   |
| <b>PAD (ABI &lt;0.90) - N (%)</b>            | 220 (3.4%)  | 359 (15%)   | 48 (22%)    | 56 (3.4%)   | 121 (3.8%)  | 312 (8.3%)    |



| Female                                       | Study       |             |             |             |             |               |
|----------------------------------------------|-------------|-------------|-------------|-------------|-------------|---------------|
|                                              | ARIC (7757) | CHS (3234)  | FHS (376)   | FOF (1870)  | MESA (3573) | NHANES (3581) |
| <b>Total of death - N (%)</b>                | 1906 (25%)  | 2485 (77%)  | 257 (68%)   | 141 (7.5%)  | 491 (14%)   | 621 (17%)     |
| <b>Follow-up time (y) - Mean(SD)</b>         | 19 (4.8)    | 14 (6.3)    | 9.4 (3.8)   | 10 (1.9)    | 13 (2.3)    | 9.2 (2.5)     |
| <b>Age (y) - Mean (SD)</b>                   | 54 (5.9)    | 72 (5.4)    | 80 (3.9)    | 58 (9.5)    | 62 (10)     | 60 (13)       |
| <b>Race/Ethnicity - N (%)</b>                |             |             |             |             |             |               |
| White                                        | 5598 (72%)  | 2698 (83%)  | 376 (100%)  | 1870 (100%) | 1359 (38%)  | 1968 (55%)    |
| Black                                        | 2159 (28%)  | 518 (16%)   | -           | -           | 1033 (29%)  | 670 (19%)     |
| Hispanic                                     | -           | 18 (0.56%)  | -           | -           | 1181 (33%)  | 943 (26%)     |
| <b>Smoking Status - N (%)</b>                |             |             |             |             |             |               |
| Never                                        | 4065 (52%)  | 1843 (57%)  | 345 (92%)   | 1569 (84%)  | 2107 (59%)  | 2043 (57%)    |
| Former                                       | 1761 (23%)  | 983 (30%)   | -           | -           | 1051 (29%)  | 1040 (29%)    |
| Current                                      | 1931 (25%)  | 408 (13%)   | 31 (8.2%)   | 301 (16%)   | 415 (12%)   | 494 (14%)     |
| <b>SBP (mmHg) - Mean (SD)</b>                | 120 (20)    | 137 (22)    | 143 (21)    | 126 (19)    | 127 (23)    | 133 (23)      |
| <b>Total cholesterol (mmol/L) - Mean(SD)</b> | 5.6 (1.1)   | 5.7 (1.0)   | 5.5 (1.0)   | 5.5 (1.0)   | 5.2 (0.9)   | 5.5 (1.0)     |
| <b>HDL cholesterol (mmol/L) - Mean(SD)</b>   | 1.5 (0.4)   | 1.5 (0.4)   | 1.4 (0.4)   | 1.5 (0.4)   | 1.5 (0.4)   | 1.5 (0.4)     |
| <b>Diabetes - N (%)</b>                      | 844 (11%)   | 421 (13%)   | 72 (19%)    | 141 (7.5%)  | 404 (11%)   | 541 (15%)     |
| <b>History of CHD or stroke - N (%)</b>      | 918 (12%)   | 388 (12%)   | 62 (16%)    | 65 (3.5%)   | 2 (0.06%)   | 338 (9.4%)    |
| <b>ABI - Mean (SD)</b>                       | 1.11 (0.14) | 1.05 (0.15) | 0.99 (0.19) | 1.08 (0.10) | 1.09 (0.11) | 1.07 (0.15)   |
| <b>PAD (ABI &lt;0.90) - N (%)</b>            | 414 (5.3%)  | 400 (12%)   | 76 (20%)    | 56 (3.0%)   | 134 (3.8%)  | 321 (9.0%)    |

SD: standard deviation; SBP: systolic blood pressure; HDL: high-density lipoprotein; ABI: ankle-brachial index; PAD: peripheral artery disease

**Table S2. Odds ratio of PAD (ABI <0.9) according to demographic factors from the pooled data of six US cohorts.**

| <b>Demographic variables</b>         | <b>Odds ratios for ABI&lt;0.9</b> |
|--------------------------------------|-----------------------------------|
| Age for White and Black male, per 5y | 1.56 (1.50, 1.61)                 |
| Female at age 65 for Whites          | 1.24 (1.12, 1.38)                 |
| Black for male                       | 2.16 (1.86, 2.52)                 |
| Hispanic at age 65 for male          | 0.76 (0.62, 0.93)                 |
| Age * female, per 5y                 | 0.90 (0.86, 0.94)                 |
| Age * Hispanic, per 5y               | 1.16 (1.06, 1.27)                 |
| Female * Black                       | 0.77 (0.63, 0.94)                 |

All variables listed were modeled simultaneously.

**Table S3. Sex- and race/ethnicity-adjusted hazard ratios (95% CIs) for mortality according to PAD (ABI <0.9) vs. no PAD (ABI ≥0.9)**

| <b>Characteristic</b>             | <b>HR (95% CIs)</b> |
|-----------------------------------|---------------------|
| Low ABI at age 65                 | 2.43 (2.18, 2.72)   |
| Low ABI * age with age<65, per 5y | 1.09 (1.00, 1.18)   |
| Low ABI * age with age≥65, per 5y | 0.87 (0.83, 0.92)   |

All variables listed were modeled simultaneously.

**Table S4. Estimated  $Q_{noPAD}$  (1-year probability of dying among persons of a given age, sex, and race/ethnicity and free of PAD) and  $I_{PAD}$  (the probability of developing PAD at a given age) at each age from birth to 80 years in each sex and racial/ethnic group.**

| Age | White men     |             | White women   |             | Black men     |             | Black women   |             | Hispanic men  |             | Hispanic women |             |
|-----|---------------|-------------|---------------|-------------|---------------|-------------|---------------|-------------|---------------|-------------|----------------|-------------|
|     | $Q_{noPAD,x}$ | $I_{PAD,x}$ | $Q_{noPAD,x}$  | $I_{PAD,x}$ |
| 0   | 0.0060382     | 0.0000224   | 0.0049966     | 0.0000843   | 0.0139084     | 0.0000534   | 0.0114623     | 0.0001567   | 0.0060643     | 0.0000032   | 0.0050652      | 0.0000130   |
| 1   | 0.0004640     | 0.0000227   | 0.0003913     | 0.0000827   | 0.0007636     | 0.0000492   | 0.0005462     | 0.0001385   | 0.0004421     | 0.0000034   | 0.0003704      | 0.0000135   |
| 2   | 0.0002985     | 0.0000247   | 0.0002167     | 0.0000881   | 0.0004622     | 0.0000535   | 0.0003487     | 0.0001476   | 0.0002846     | 0.0000039   | 0.0001887      | 0.0000148   |
| 3   | 0.0002337     | 0.0000270   | 0.0001573     | 0.0000941   | 0.0003470     | 0.0000584   | 0.0003214     | 0.0001577   | 0.0001934     | 0.0000043   | 0.0001619      | 0.0000163   |
| 4   | 0.0001671     | 0.0000294   | 0.0001427     | 0.0001006   | 0.0003105     | 0.0000637   | 0.0002063     | 0.0001682   | 0.0001723     | 0.0000049   | 0.0001383      | 0.0000180   |
| 5   | 0.0001565     | 0.0000322   | 0.0001248     | 0.0001076   | 0.0002693     | 0.0000696   | 0.0001894     | 0.0001798   | 0.0001467     | 0.0000055   | 0.0001203      | 0.0000198   |
| 6   | 0.0001400     | 0.0000351   | 0.0001138     | 0.0001150   | 0.0002516     | 0.0000760   | 0.0001582     | 0.0001921   | 0.0001289     | 0.0000062   | 0.0001081      | 0.0000218   |
| 7   | 0.0001247     | 0.0000384   | 0.0001052     | 0.0001229   | 0.0002293     | 0.0000830   | 0.0001376     | 0.0002053   | 0.0001123     | 0.0000069   | 0.0001002      | 0.0000241   |
| 8   | 0.0001055     | 0.0000419   | 0.0000965     | 0.0001314   | 0.0001909     | 0.0000906   | 0.0001260     | 0.0002195   | 0.0000921     | 0.0000078   | 0.0000954      | 0.0000265   |
| 9   | 0.0000837     | 0.0000457   | 0.0000878     | 0.0001405   | 0.0001394     | 0.0000989   | 0.0001226     | 0.0002346   | 0.0000692     | 0.0000088   | 0.0000937      | 0.0000292   |
| 10  | 0.0000684     | 0.0000500   | 0.0000821     | 0.0001502   | 0.0000945     | 0.0001079   | 0.0001278     | 0.0002509   | 0.0000519     | 0.0000099   | 0.0000958      | 0.0000322   |
| 11  | 0.0000756     | 0.0000546   | 0.0000852     | 0.0001606   | 0.0000901     | 0.0001179   | 0.0001428     | 0.0002683   | 0.0000557     | 0.0000111   | 0.0001033      | 0.0000355   |
| 12  | 0.0001238     | 0.0000597   | 0.0001036     | 0.0001718   | 0.0001644     | 0.0001289   | 0.0001687     | 0.0002869   | 0.0000996     | 0.0000125   | 0.0001185      | 0.0000391   |
| 13  | 0.0002216     | 0.0000653   | 0.0001402     | 0.0001838   | 0.0003333     | 0.0001411   | 0.0002048     | 0.0003070   | 0.0001949     | 0.0000141   | 0.0001420      | 0.0000431   |
| 14  | 0.0003528     | 0.0000714   | 0.0001885     | 0.0001967   | 0.0005609     | 0.0001546   | 0.0002471     | 0.0003284   | 0.0003287     | 0.0000159   | 0.0001714      | 0.0000475   |
| 15  | 0.0004888     | 0.0000782   | 0.0002412     | 0.0002105   | 0.0007961     | 0.0001695   | 0.0002919     | 0.0003514   | 0.0004750     | 0.0000180   | 0.0002050      | 0.0000523   |
| 16  | 0.0006165     | 0.0000855   | 0.0002894     | 0.0002253   | 0.0010067     | 0.0001857   | 0.0003363     | 0.0003759   | 0.0006159     | 0.0000202   | 0.0002375      | 0.0000577   |
| 17  | 0.0007456     | 0.0000936   | 0.0003290     | 0.0002410   | 0.0012031     | 0.0002033   | 0.0003806     | 0.0004022   | 0.0007552     | 0.0000228   | 0.0002642      | 0.0000636   |
| 18  | 0.0008759     | 0.0001024   | 0.0003567     | 0.0002578   | 0.0013860     | 0.0002227   | 0.0004264     | 0.0004303   | 0.0008895     | 0.0000257   | 0.0002825      | 0.0000701   |
| 19  | 0.0010050     | 0.0001121   | 0.0003762     | 0.0002757   | 0.0015626     | 0.0002438   | 0.0004753     | 0.0004604   | 0.0010173     | 0.0000290   | 0.0002946      | 0.0000772   |
| 20  | 0.0011433     | 0.0001227   | 0.0003953     | 0.0002949   | 0.0017594     | 0.0002670   | 0.0005314     | 0.0004926   | 0.0011544     | 0.0000327   | 0.0003057      | 0.0000851   |
| 21  | 0.0012718     | 0.0001342   | 0.0004165     | 0.0003154   | 0.0019565     | 0.0002924   | 0.0005905     | 0.0005271   | 0.0012811     | 0.0000368   | 0.0003183      | 0.0000938   |
| 22  | 0.0013553     | 0.0001468   | 0.0004351     | 0.0003373   | 0.0020987     | 0.0003199   | 0.0006429     | 0.0005640   | 0.0013514     | 0.0000415   | 0.0003299      | 0.0001033   |
| 23  | 0.0013763     | 0.0001604   | 0.0004506     | 0.0003606   | 0.0021539     | 0.0003496   | 0.0006812     | 0.0006032   | 0.0013446     | 0.0000467   | 0.0003399      | 0.0001139   |
| 24  | 0.0013519     | 0.0001751   | 0.0004637     | 0.0003856   | 0.0021411     | 0.0003817   | 0.0007082     | 0.0006449   | 0.0012869     | 0.0000525   | 0.0003483      | 0.0001255   |
| 25  | 0.0013129     | 0.0001911   | 0.0004772     | 0.0004123   | 0.0021021     | 0.0004166   | 0.0007343     | 0.0006896   | 0.0012171     | 0.0000590   | 0.0003576      | 0.0001382   |
| 26  | 0.0012838     | 0.0002086   | 0.0004921     | 0.0004408   | 0.0020757     | 0.0004547   | 0.0007659     | 0.0007373   | 0.0011620     | 0.0000664   | 0.0003666      | 0.0001523   |
| 27  | 0.0012646     | 0.0002278   | 0.0005073     | 0.0004713   | 0.0020680     | 0.0004964   | 0.0008011     | 0.0007884   | 0.0011209     | 0.0000747   | 0.0003724      | 0.0001678   |
| 28  | 0.0012644     | 0.0002488   | 0.0005239     | 0.0005039   | 0.0020970     | 0.0005422   | 0.0008440     | 0.0008431   | 0.0011004     | 0.0000841   | 0.0003743      | 0.0001849   |

|     | White men            |                   | White women          |                   | Black men            |                   | Black women          |                   | Hispanic men         |                   | Hispanic women       |                   |
|-----|----------------------|-------------------|----------------------|-------------------|----------------------|-------------------|----------------------|-------------------|----------------------|-------------------|----------------------|-------------------|
| Age | Q <sub>noPAD,x</sub> | IPAD <sub>x</sub> |
| 29  | 0.0012809            | 0.0002718         | 0.0005439            | 0.0005388         | 0.0021585            | 0.0005925         | 0.0008969            | 0.0009017         | 0.0010957            | 0.0000946         | 0.0003752            | 0.0002037         |
| 30  | 0.0013052            | 0.0002969         | 0.0005700            | 0.0005762         | 0.0022380            | 0.0006475         | 0.0009625            | 0.0009645         | 0.0010937            | 0.0001065         | 0.0003758            | 0.0002244         |
| 31  | 0.0013319            | 0.0003243         | 0.0006035            | 0.0006162         | 0.0023173            | 0.0007077         | 0.0010386            | 0.0010319         | 0.0010919            | 0.0001198         | 0.0003822            | 0.0002472         |
| 32  | 0.0013633            | 0.0003543         | 0.0006420            | 0.0006590         | 0.0024199            | 0.0007736         | 0.0011237            | 0.0011041         | 0.0010792            | 0.0001348         | 0.0003976            | 0.0002723         |
| 33  | 0.0014067            | 0.0003872         | 0.0006875            | 0.0007048         | 0.0024507            | 0.0008447         | 0.0012012            | 0.0011811         | 0.0011309            | 0.0001518         | 0.0004378            | 0.0003002         |
| 34  | 0.0014546            | 0.0004231         | 0.0007357            | 0.0007538         | 0.0024994            | 0.0009226         | 0.0012825            | 0.0012634         | 0.0011744            | 0.0001710         | 0.0004881            | 0.0003308         |
| 35  | 0.0015152            | 0.0004623         | 0.0007896            | 0.0008063         | 0.0025566            | 0.0010076         | 0.0013684            | 0.0013515         | 0.0012266            | 0.0001925         | 0.0005467            | 0.0003647         |
| 36  | 0.0015917            | 0.0005053         | 0.0008520            | 0.0008626         | 0.0026413            | 0.0011009         | 0.0014700            | 0.0014460         | 0.0012897            | 0.0002168         | 0.0006083            | 0.0004020         |
| 37  | 0.0016831            | 0.0005525         | 0.0009244            | 0.0009229         | 0.0027590            | 0.0012032         | 0.0015956            | 0.0015477         | 0.0013744            | 0.0002441         | 0.0006733            | 0.0004431         |
| 38  | 0.0017931            | 0.0006041         | 0.0010105            | 0.0009876         | 0.0029212            | 0.0013156         | 0.0017535            | 0.0016574         | 0.0014851            | 0.0002750         | 0.0007402            | 0.0004884         |
| 39  | 0.0019260            | 0.0006607         | 0.0011116            | 0.0010570         | 0.0031279            | 0.0014393         | 0.0019419            | 0.0017756         | 0.0016183            | 0.0003099         | 0.0008113            | 0.0005384         |
| 40  | 0.0020736            | 0.0007227         | 0.0012201            | 0.0011315         | 0.0033660            | 0.0015750         | 0.0021443            | 0.0019025         | 0.0017709            | 0.0003493         | 0.0008882            | 0.0005935         |
| 41  | 0.0022445            | 0.0007908         | 0.0013391            | 0.0012113         | 0.0036306            | 0.0017240         | 0.0023579            | 0.0020387         | 0.0019347            | 0.0003936         | 0.0009758            | 0.0006543         |
| 42  | 0.0024567            | 0.0008657         | 0.0014791            | 0.0012971         | 0.0039327            | 0.0018876         | 0.0025970            | 0.0021853         | 0.0021018            | 0.0004436         | 0.0010788            | 0.0007214         |
| 43  | 0.0027111            | 0.0009481         | 0.0016388            | 0.0013895         | 0.0042697            | 0.0020675         | 0.0028596            | 0.0023431         | 0.0022656            | 0.0004999         | 0.0011998            | 0.0007955         |
| 44  | 0.0029929            | 0.0010388         | 0.0018088            | 0.0014885         | 0.0046392            | 0.0022649         | 0.0031371            | 0.0025125         | 0.0024302            | 0.0005633         | 0.0013354            | 0.0008773         |
| 45  | 0.0032796            | 0.0011380         | 0.0019808            | 0.0015945         | 0.0050127            | 0.0024808         | 0.0034143            | 0.0026937         | 0.0026051            | 0.0006348         | 0.0014803            | 0.0009675         |
| 46  | 0.0035701            | 0.0012466         | 0.0021511            | 0.0017077         | 0.0054195            | 0.0027179         | 0.0036944            | 0.0028875         | 0.0028008            | 0.0007154         | 0.0016308            | 0.0010670         |
| 47  | 0.0038829            | 0.0013658         | 0.0023230            | 0.0018289         | 0.0059230            | 0.0029806         | 0.0039956            | 0.0030958         | 0.0030221            | 0.0008064         | 0.0017885            | 0.0011767         |
| 48  | 0.0042294            | 0.0014969         | 0.0025008            | 0.0019586         | 0.0065616            | 0.0032736         | 0.0043302            | 0.0033203         | 0.0032787            | 0.0009093         | 0.0019546            | 0.0012977         |
| 49  | 0.0046108            | 0.0016412         | 0.0026893            | 0.0020976         | 0.0073193            | 0.0035996         | 0.0046969            | 0.0035623         | 0.0035729            | 0.0010254         | 0.0021313            | 0.0014311         |
| 50  | 0.0050250            | 0.0017997         | 0.0028966            | 0.0022470         | 0.0081400            | 0.0039596         | 0.0050937            | 0.0038230         | 0.0038966            | 0.0011567         | 0.0023275            | 0.0015784         |
| 51  | 0.0054540            | 0.0019737         | 0.0031166            | 0.0024071         | 0.0089777            | 0.0043546         | 0.0054976            | 0.0041021         | 0.0042487            | 0.0013048         | 0.0025373            | 0.0017408         |
| 52  | 0.0058863            | 0.0021641         | 0.0033389            | 0.0025784         | 0.0098475            | 0.0047887         | 0.0058881            | 0.0043992         | 0.0046412            | 0.0014723         | 0.0027448            | 0.0019196         |
| 53  | 0.0063126            | 0.0023721         | 0.0035593            | 0.0027612         | 0.0107327            | 0.0052643         | 0.0062480            | 0.0047139         | 0.0050751            | 0.0016617         | 0.0029394            | 0.0021160         |
| 54  | 0.0067439            | 0.0025997         | 0.0037875            | 0.0029569         | 0.0116324            | 0.0057851         | 0.0065891            | 0.0050478         | 0.0055457            | 0.0018756         | 0.0031267            | 0.0023317         |
| 55  | 0.0071995            | 0.0028493         | 0.0040285            | 0.0031665         | 0.0126175            | 0.0063601         | 0.0069414            | 0.0054048         | 0.0060732            | 0.0021177         | 0.0033222            | 0.0025692         |
| 56  | 0.0077006            | 0.0031239         | 0.0043064            | 0.0033925         | 0.0136499            | 0.0069919         | 0.0073299            | 0.0057884         | 0.0066381            | 0.0023913         | 0.0035436            | 0.0028310         |
| 57  | 0.0082524            | 0.0034261         | 0.0046479            | 0.0036379         | 0.0146019            | 0.0076739         | 0.0077575            | 0.0062010         | 0.0071853            | 0.0026989         | 0.0037959            | 0.0031199         |
| 58  | 0.0088623            | 0.0037590         | 0.0050702            | 0.0039056         | 0.0154138            | 0.0084032         | 0.0082455            | 0.0066470         | 0.0076792            | 0.0030435         | 0.0040906            | 0.0034389         |
| 59  | 0.0095266            | 0.0041256         | 0.0055632            | 0.0041969         | 0.0161333            | 0.0091859         | 0.0088041            | 0.0071303         | 0.0081361            | 0.0034297         | 0.0044293            | 0.0037913         |
| 60  | 0.0102477            | 0.0045293         | 0.0061153            | 0.0045131         | 0.0168518            | 0.0100342         | 0.0094446            | 0.0076552         | 0.0085940            | 0.0038633         | 0.0048068            | 0.0041803         |
| 61  | 0.0110167            | 0.0049731         | 0.0067012            | 0.0048541         | 0.0176850            | 0.0109664         | 0.0101553            | 0.0082236         | 0.0091131            | 0.0043522         | 0.0052209            | 0.0046094         |

|     | White men            |                   | White women          |                   | Black men            |                   | Black women          |                   | Hispanic men         |                   | Hispanic women       |                   |
|-----|----------------------|-------------------|----------------------|-------------------|----------------------|-------------------|----------------------|-------------------|----------------------|-------------------|----------------------|-------------------|
| Age | Q <sub>noPAD,x</sub> | IPAD <sub>x</sub> |
| 62  | 0.0118283            | 0.0054606         | 0.0073075            | 0.0052206         | 0.0186714            | 0.0119955         | 0.0109087            | 0.0088352         | 0.0097311            | 0.0049049         | 0.0056814            | 0.0050830         |
| 63  | 0.0126917            | 0.0059964         | 0.0079283            | 0.0056138         | 0.0198587            | 0.0131373         | 0.0116616            | 0.0094862         | 0.0105013            | 0.0055323         | 0.0061945            | 0.0056060         |
| 64  | 0.0136353            | 0.0065873         | 0.0085877            | 0.0060379         | 0.0212007            | 0.0143965         | 0.0124078            | 0.0101778         | 0.0114238            | 0.0062445         | 0.0067682            | 0.0061839         |
| 65  | 0.0147176            | 0.0072435         | 0.0093504            | 0.0065019         | 0.0226730            | 0.0157796         | 0.0132002            | 0.0109203         | 0.0124666            | 0.0070506         | 0.0074245            | 0.0068238         |
| 66  | 0.0160049            | 0.0079061         | 0.0102757            | 0.0069601         | 0.0243399            | 0.0170951         | 0.0141728            | 0.0116198         | 0.0136317            | 0.0079138         | 0.0081928            | 0.0074993         |
| 67  | 0.0174127            | 0.0086245         | 0.0112766            | 0.0074467         | 0.0259332            | 0.0184635         | 0.0152008            | 0.0123524         | 0.0148693            | 0.0088727         | 0.0090175            | 0.0082349         |
| 68  | 0.0188965            | 0.0093973         | 0.0123221            | 0.0079586         | 0.0273930            | 0.0198724         | 0.0163035            | 0.0131210         | 0.0161176            | 0.0099304         | 0.0098661            | 0.0090312         |
| 69  | 0.0204738            | 0.0102279         | 0.0134457            | 0.0084996         | 0.0287685            | 0.0213276         | 0.0175170            | 0.0139308         | 0.0173635            | 0.0110932         | 0.0107413            | 0.0098919         |
| 70  | 0.0221607            | 0.0111198         | 0.0146714            | 0.0090724         | 0.0300198            | 0.0228187         | 0.0187703            | 0.0147688         | 0.0186248            | 0.0123694         | 0.0116419            | 0.0108198         |
| 71  | 0.0241157            | 0.0120897         | 0.0161474            | 0.0096932         | 0.0314385            | 0.0243945         | 0.0200805            | 0.0156364         | 0.0199747            | 0.0137721         | 0.0126443            | 0.0118253         |
| 72  | 0.0264680            | 0.0131521         | 0.0178453            | 0.0103582         | 0.0334119            | 0.0261226         | 0.0217066            | 0.0165750         | 0.0214678            | 0.0153135         | 0.0138401            | 0.0129205         |
| 73  | 0.0291013            | 0.0142969         | 0.0197306            | 0.0110628         | 0.0357968            | 0.0279724         | 0.0236453            | 0.0175806         | 0.0231860            | 0.0170080         | 0.0153101            | 0.0141170         |
| 74  | 0.0319259            | 0.0155148         | 0.0217536            | 0.0118001         | 0.0388376            | 0.0299813         | 0.0258418            | 0.0186399         | 0.0251324            | 0.0188624         | 0.0170373            | 0.0154157         |
| 75  | 0.0349096            | 0.0168013         | 0.0239242            | 0.0125695         | 0.0424434            | 0.0321215         | 0.0282534            | 0.0197410         | 0.0271593            | 0.0208667         | 0.0188975            | 0.0168052         |
| 76  | 0.0381151            | 0.0181601         | 0.0263736            | 0.0133823         | 0.0460587            | 0.0342791         | 0.0307084            | 0.0208507         | 0.0294029            | 0.0230360         | 0.0208046            | 0.0182762         |
| 77  | 0.0418193            | 0.0196147         | 0.0291561            | 0.0142405         | 0.0501478            | 0.0365214         | 0.0336099            | 0.0220262         | 0.0320727            | 0.0253914         | 0.0229083            | 0.0198430         |
| 78  | 0.0461280            | 0.0211697         | 0.0324286            | 0.0151552         | 0.0546033            | 0.0388095         | 0.0369800            | 0.0232601         | 0.0353255            | 0.0279459         | 0.0253269            | 0.0215153         |
| 79  | 0.0511228            | 0.0228234         | 0.0361976            | 0.0161199         | 0.0592316            | 0.0410888         | 0.0400724            | 0.0244320         | 0.0392497            | 0.0307010         | 0.0281402            | 0.0232964         |
| 80  | 0.0564387            | 0.0245285         | 0.0402896            | 0.0171093         | 0.0641786            | 0.0433605         | 0.0437745            | 0.0256629         | 0.0436807            | 0.0336254         | 0.0312835            | 0.0251719         |

**Table S5. 1-year probability of dying among those with ABI >0.9 by age categories.**

| Age, years            | Q <sub>noPAD,x</sub><br>MCMC model | Mortality rate in cohort |           |           |           |           |           |
|-----------------------|------------------------------------|--------------------------|-----------|-----------|-----------|-----------|-----------|
|                       |                                    | ARIC                     | CHS       | FHS       | FOF       | MESA      | NHANES    |
| <b>White men</b>      |                                    |                          |           |           |           |           |           |
| 45                    | 0.0032795                          | 0.0021880                | 0.0009498 | 0.0011324 | 0.0005746 | 0.0004181 | 0.0016187 |
| 55                    | 0.0071989                          | 0.0057350                | 0.0024921 | 0.0029707 | 0.0015080 | 0.0010976 | 0.0038198 |
| 65                    | 0.0147150                          | 0.0149888                | 0.0065306 | 0.0077816 | 0.0039548 | 0.0028795 | 0.0090004 |
| 75                    | 0.0349024                          | 0.0425772                | 0.0186995 | 0.0222554 | 0.0113516 | 0.0082735 | 0.0211321 |
| <b>White women</b>    |                                    |                          |           |           |           |           |           |
| 45                    | 0.0019808                          | 0.0014211                | 0.0006168 | 0.0007354 | 0.0003731 | 0.0002715 | 0.0010181 |
| 55                    | 0.0040288                          | 0.0037273                | 0.0016188 | 0.0019298 | 0.0009793 | 0.0007128 | 0.0024036 |
| 65                    | 0.0093520                          | 0.0097574                | 0.0042450 | 0.0050592 | 0.0025695 | 0.0018705 | 0.0056688 |
| 75                    | 0.0239289                          | 0.0278543                | 0.0121811 | 0.0145066 | 0.0073849 | 0.0053795 | 0.0133401 |
| <b>Black men</b>      |                                    |                          |           |           |           |           |           |
| 45                    | 0.0050128                          | 0.0031765                | 0.0013794 |           |           | 0.0006073 | 0.0025685 |
| 55                    | 0.0126175                          | 0.0083194                | 0.0036179 |           |           | 0.0015939 | 0.0060572 |
| 65                    | 0.0226729                          | 0.0216977                | 0.0065306 |           |           | 0.0028795 | 0.0142504 |
| 75                    | 0.0424430                          | 0.0612442                | 0.0270464 |           |           | 0.0119950 | 0.0333385 |
| <b>Black women</b>    |                                    |                          |           |           |           |           |           |
| 45                    | 0.0034142                          | 0.0020636                | 0.0008958 |           |           | 0.0003944 | 0.0016158 |
| 55                    | 0.0069412                          | 0.0054094                | 0.0023504 |           |           | 0.0010352 | 0.0038130 |
| 65                    | 0.0132003                          | 0.0141417                | 0.0061600 |           |           | 0.0027158 | 0.0089843 |
| 75                    | 0.0282548                          | 0.0402030                | 0.0176446 |           |           | 0.0078044 | 0.0210944 |
| <b>Hispanic men</b>   |                                    |                          |           |           |           |           |           |
| 45                    | 0.0026056                          |                          | 0.0008874 |           |           | 0.0003907 | 0.0018822 |
| 55                    | 0.0060763                          |                          | 0.0023285 |           |           | 0.0010255 | 0.0044408 |
| 65                    | 0.0124837                          |                          | 0.0061026 |           |           | 0.0026905 | 0.0104592 |
| 75                    | 0.0272090                          |                          | 0.0174811 |           |           | 0.0077317 | 0.0245326 |
| <b>Hispanic women</b> |                                    |                          |           |           |           |           |           |
| 45                    | 0.0014800                          |                          | 0.0005763 |           |           | 0.0002537 | 0.0011839 |
| 55                    | 0.0033205                          |                          | 0.0015124 |           |           | 0.0006659 | 0.0027946 |
| 65                    | 0.0074147                          |                          | 0.0039665 |           |           | 0.0017476 | 0.0065894 |
| 75                    | 0.0188635                          |                          | 0.0113849 |           |           | 0.0050268 | 0.0154967 |

**Figure S1. Prevalence estimates of PAD according to odds of PAD at a given demographic variables in NHANES and meta-analyzed odds ratio for age, sex, and race/ethnicity from six cohorts.**

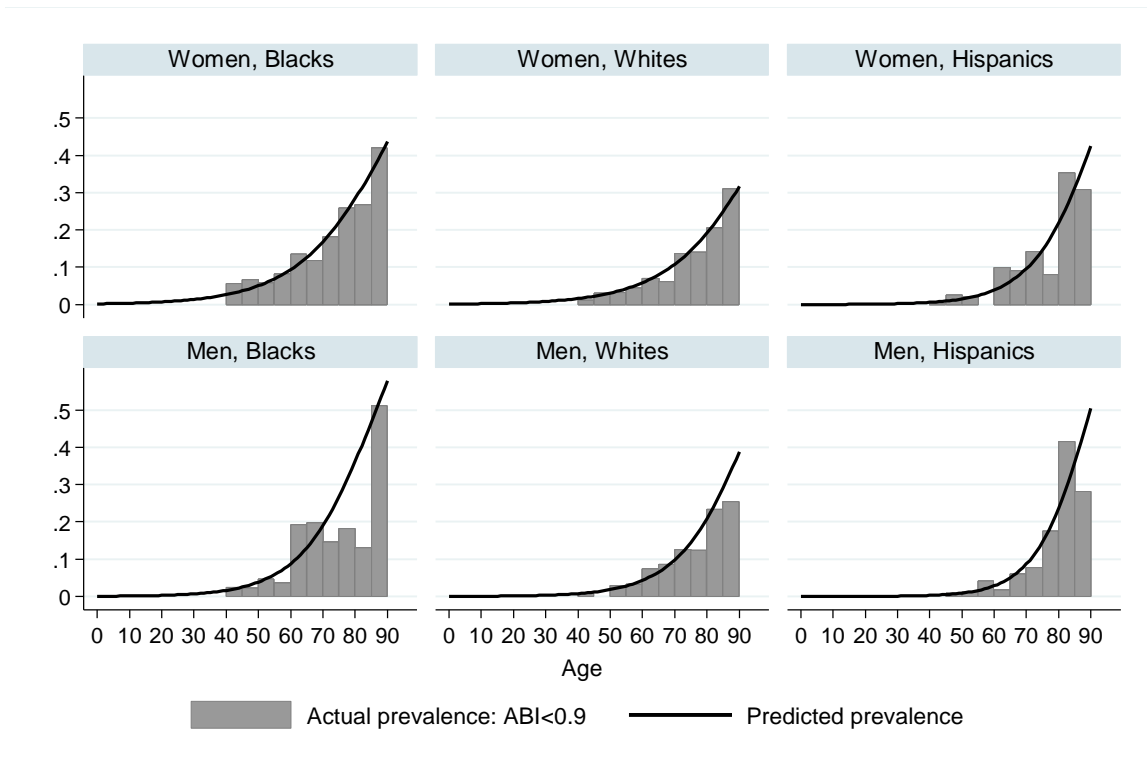



**Figure S2. Observed vs. predicted risk of PAD by deciles of predicted risk (cross-validation by splitting NHANES according to 2-year cycles).**

1. 1999-2002 for development and 2003-2004 for validation

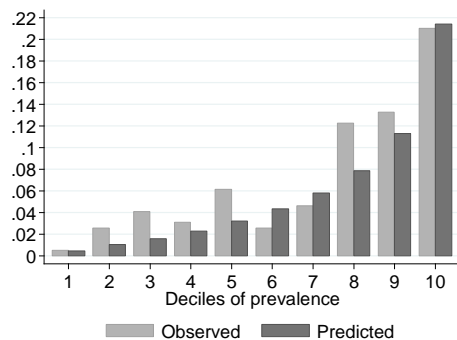

2. 1999-2000 and 2003-2004 for development and 2001-2002 for validation

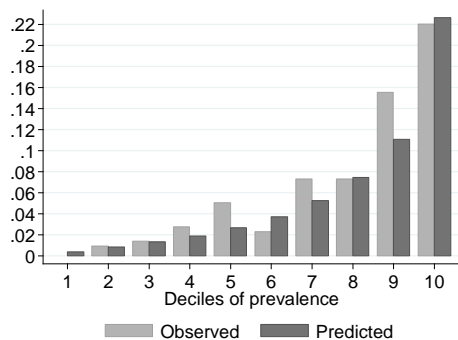

3. 2001-2004 for development and 1999-2000 for validation

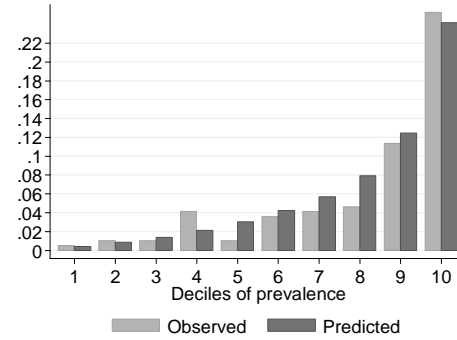

|                       |            | Statistics in a validation dataset |                  |               |             |
|-----------------------|------------|------------------------------------|------------------|---------------|-------------|
|                       |            | Chi <sup>2</sup> , p-value         |                  |               | C-statistic |
| Development           | Validation | All deciles                        | Bottom 5 deciles | Top 5 deciles |             |
| 1999-2002             | 2003-2004  | 26.5, 0.0002                       | 18.6, 0.0002     | 8.0, 0.14     | 0.736       |
| 1999-2000 & 2003-2004 | 2001-2002  | 14.1, 0.11                         | 6.5, 0.27        | 7.7, 0.17     | 0.786       |
| 2001-2004             | 1999-2000  | 11.1, 0.28                         | 6.7, 0.25        | 4.3, 0.54     | 0.801       |

Figure S3. Observed vs. predicted risk of PAD by deciles of predicted risk (NHANES 1999-2004).

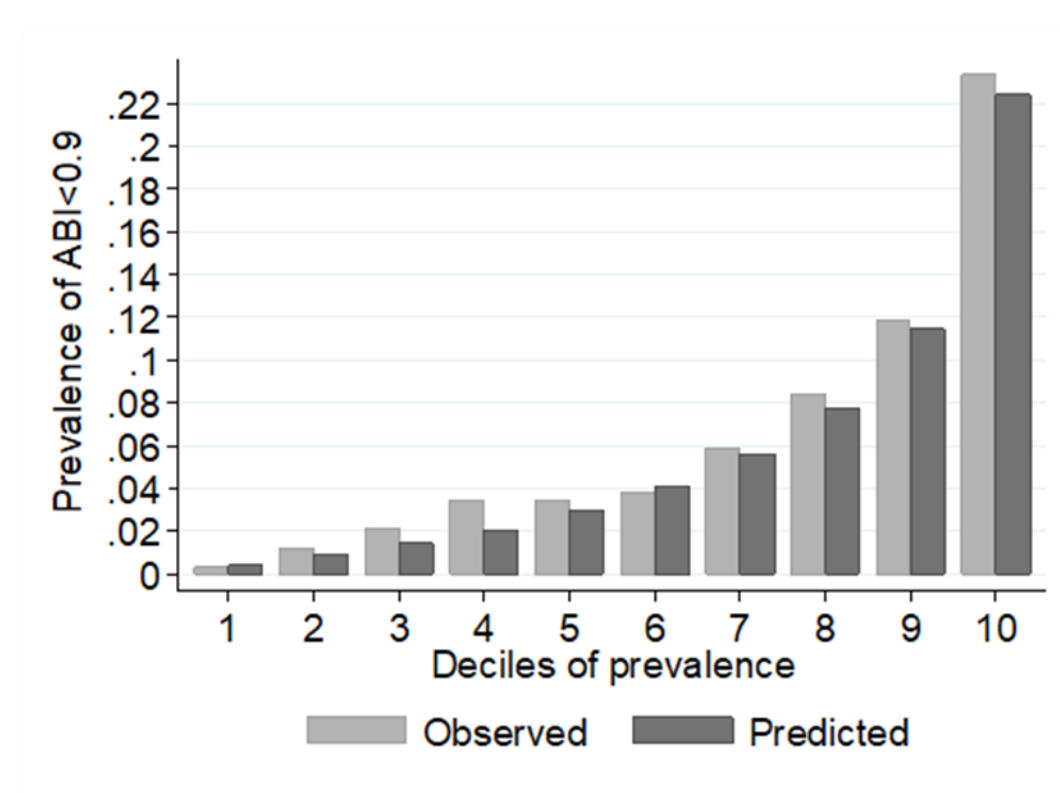

Chi<sup>2</sup> was 10.2 (p=0.35) in all deciles, 9.2 (p=0.08) in bottom 5 deciles, and 1.0 (p=0.95) in top 5 deciles. C-statistic was 0.77.

### Supplemental References:

1. Hua S, Loehr LR, Tanaka H, Heiss G, Coresh J, Selvin E, Matsushita K. Ankle-brachial index and incident diabetes mellitus: the atherosclerosis risk in communities (ARIC) study. *Cardiovasc Diabetol.* 2016;15:163.
2. Murabito JM, Evans JC, Larson MG, Nieto K, Levy D, Wilson PW, Framingham S. The ankle-brachial index in the elderly and risk of stroke, coronary disease, and death: the Framingham Study. *Arch Intern Med.* 2003;163:1939-1942.
3. Murabito JM, Evans JC, Nieto K, Larson MG, Levy D, Wilson PW. Prevalence and clinical correlates of peripheral arterial disease in the Framingham Offspring Study. *Am Heart J.* 2002;143:961-965.
4. Matsushita K, Sang Y, Ballew SH, Shlipak M, Katz R, Rosas SE, Peralta CA, Woodward M, Kramer HJ, Jacobs DR, Sarnak MJ, Coresh J. Subclinical Atherosclerosis Measures for Cardiovascular Prediction in CKD. *Journal of the American Society of Nephrology.* 2015;26:439-447.
5. Selvin E, Erlinger TP. Prevalence of and risk factors for peripheral arterial disease in the United States: results from the National Health and Nutrition Examination Survey, 1999-2000. *Circulation.* 2004;110:738-743.
